# Supplementary material for: The sequence at Spike S1/S2 site enables cleavage by furin and phospho-regulation in SARS-CoV2 but not in SARS-CoV1 or MERS-CoV
Source: PubMed Central journal article supplement (PMC7547067; doi:10.1038/s41598-020-74101-0), 2020-10-09
Supplement: 41598_2020_74101_MOESM1_ESM.pdf [file 41598_2020_74101_MOESM1_ESM.pdf]

## **SUPPLEMENTARY INFORMATION**

### **The sequence at Spike S1/S2 site enables cleavage by furin and phosphoregulation in SARS-CoV2 but not in SARS-CoV1 or MERS-CoV**

Mihkel Örd, Ilona Faustova, and Mart Loog\*

Institute of Technology, University of Tartu, Tartu 50411, Estonia

\* Corresponding author (mart.loog@ut.ee)

**a**

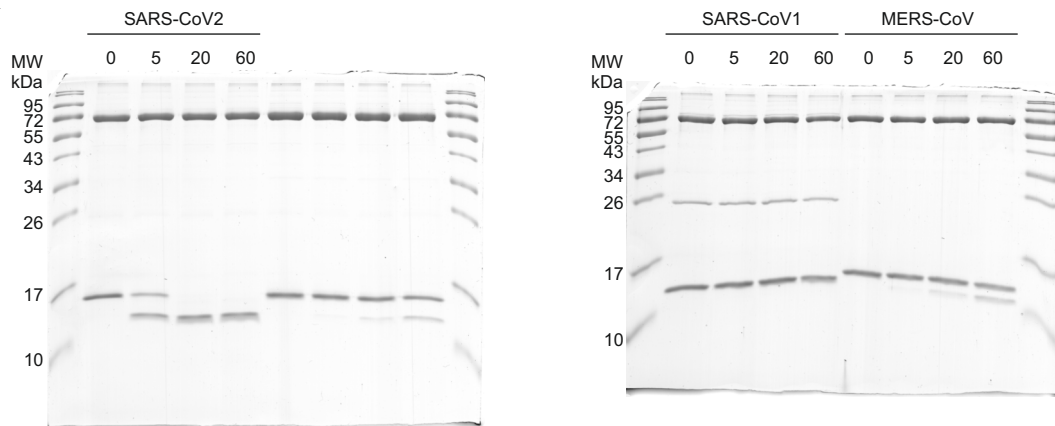

**b**

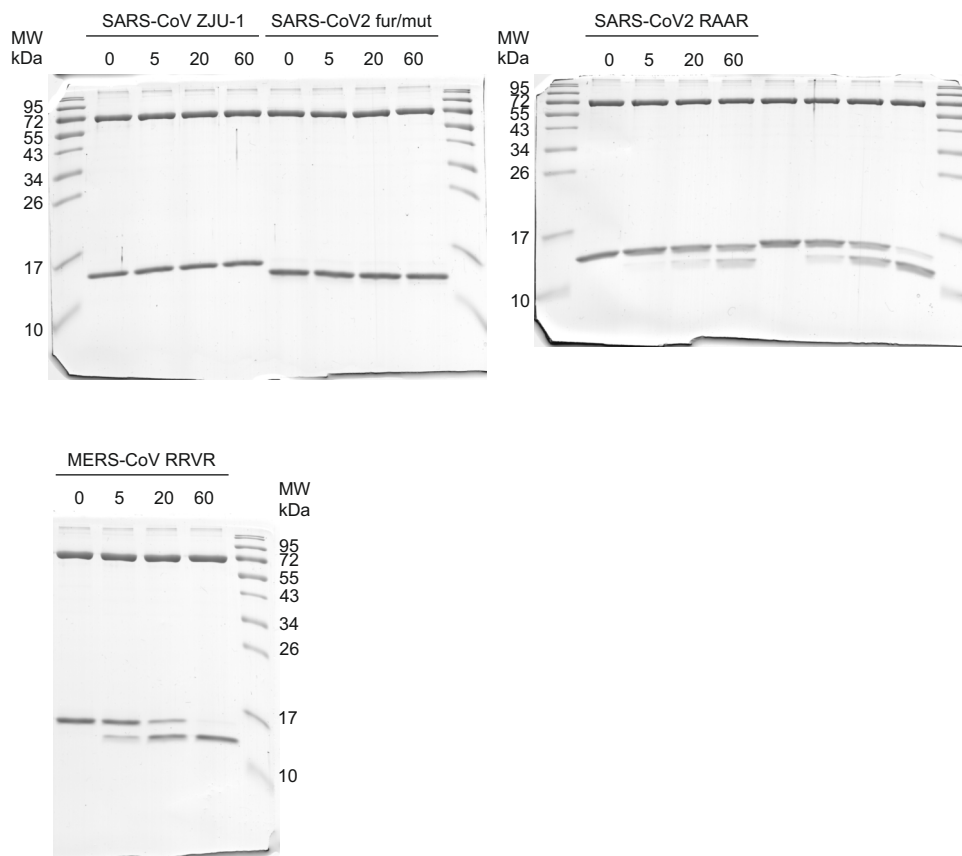

**Supplementary Figure 1. Uncropped gels of Figure 1 (a) and Figure 2 (b).**

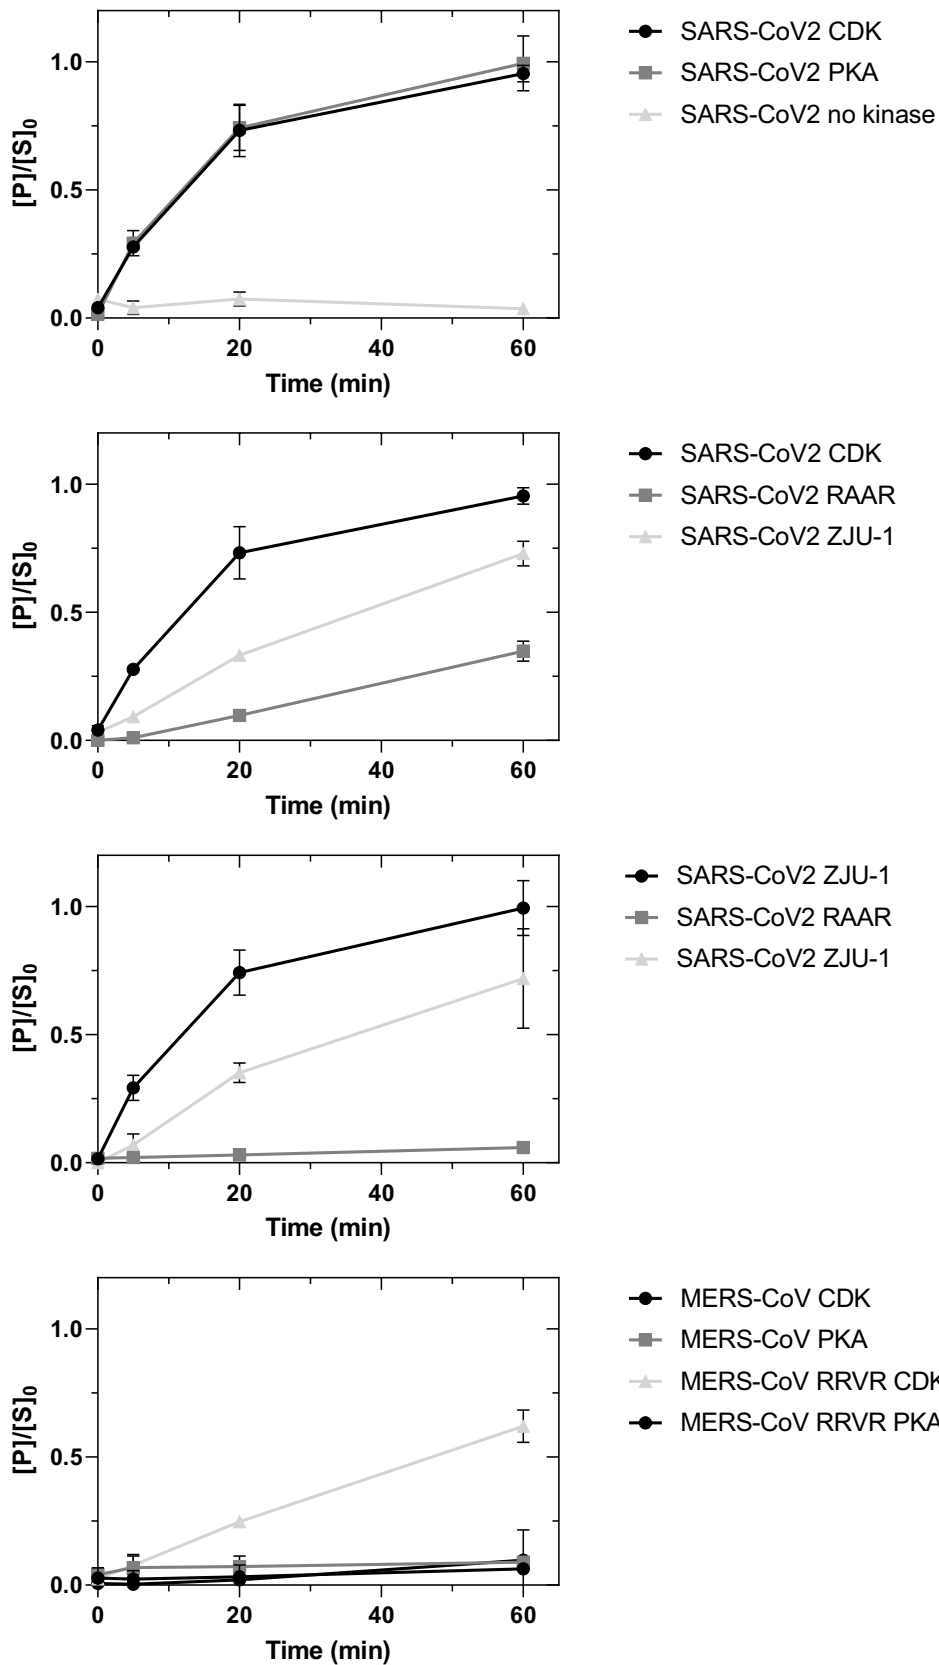

**Supplementary Figure 2. Phosphorylation of SARS-CoV2 and MERS-CoV S1/S2 sites *in vitro*.** The plots show accumulation of phosphorylated form of the indicated S1/S2-GB1 reporter protein in phosphorylation assays presented in Figure 3. The plots show relative abundance of phosphorylated form ( $[P]$ ) compared to non-phosphorylated form at  $t=0$  ( $[S]_0$ ). Error bars show standard deviation.

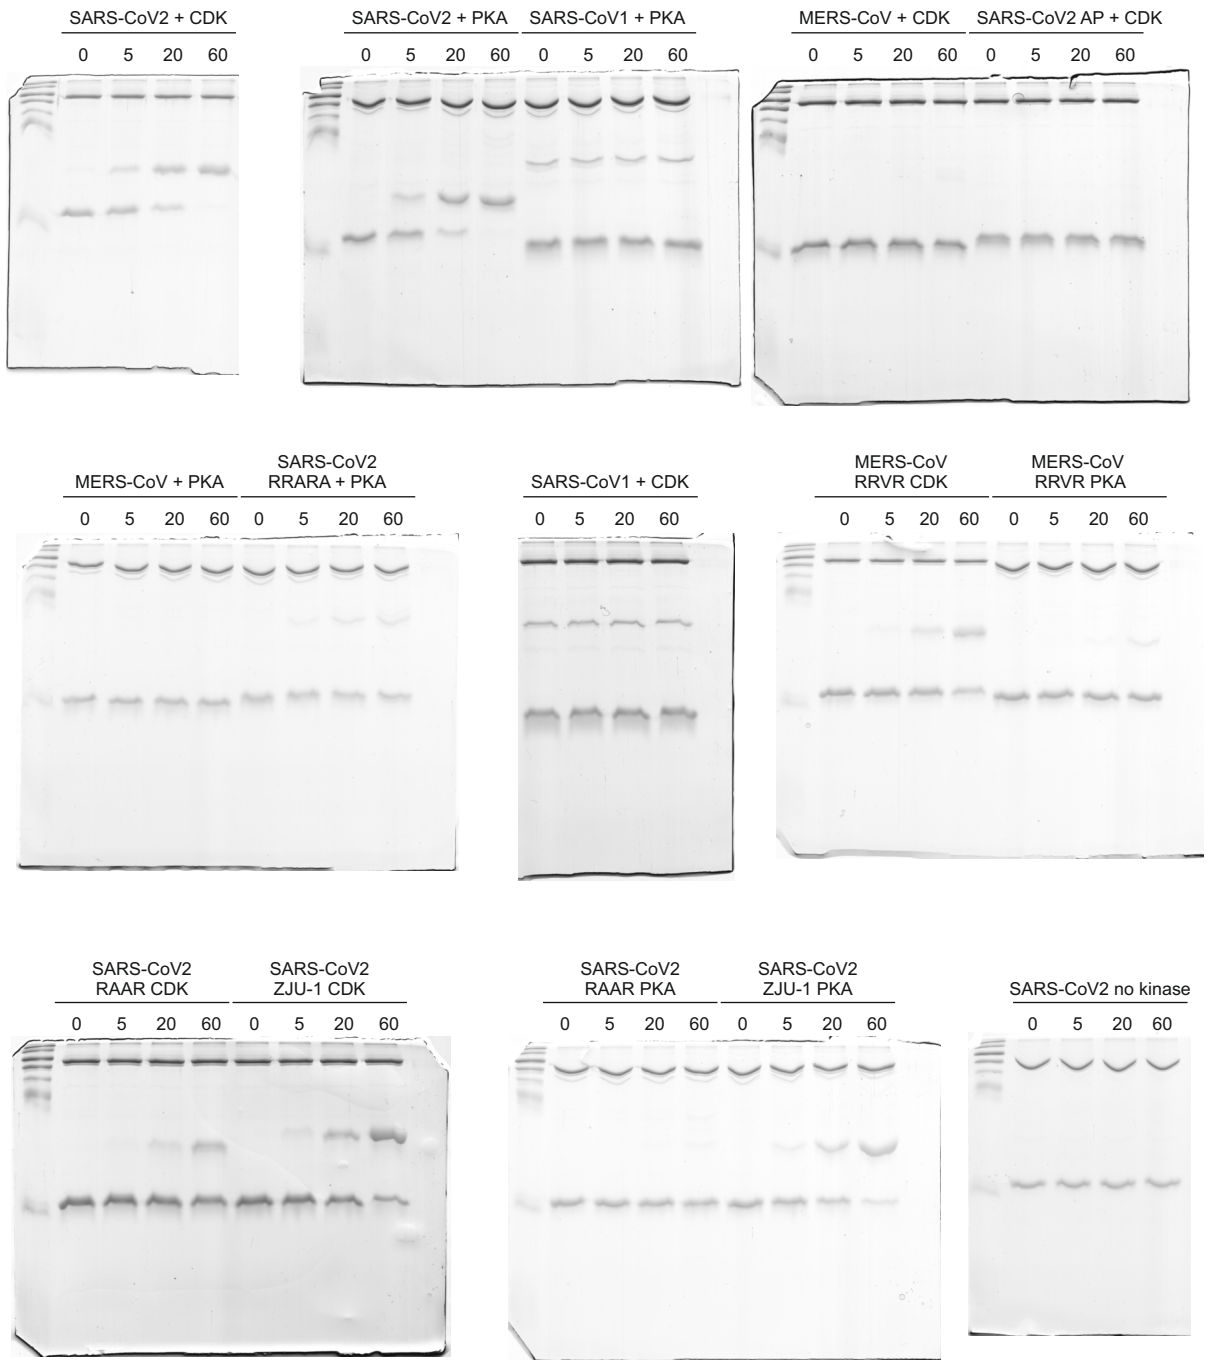

**Supplementary Figure 3. Uncropped gels of Figure 3.**

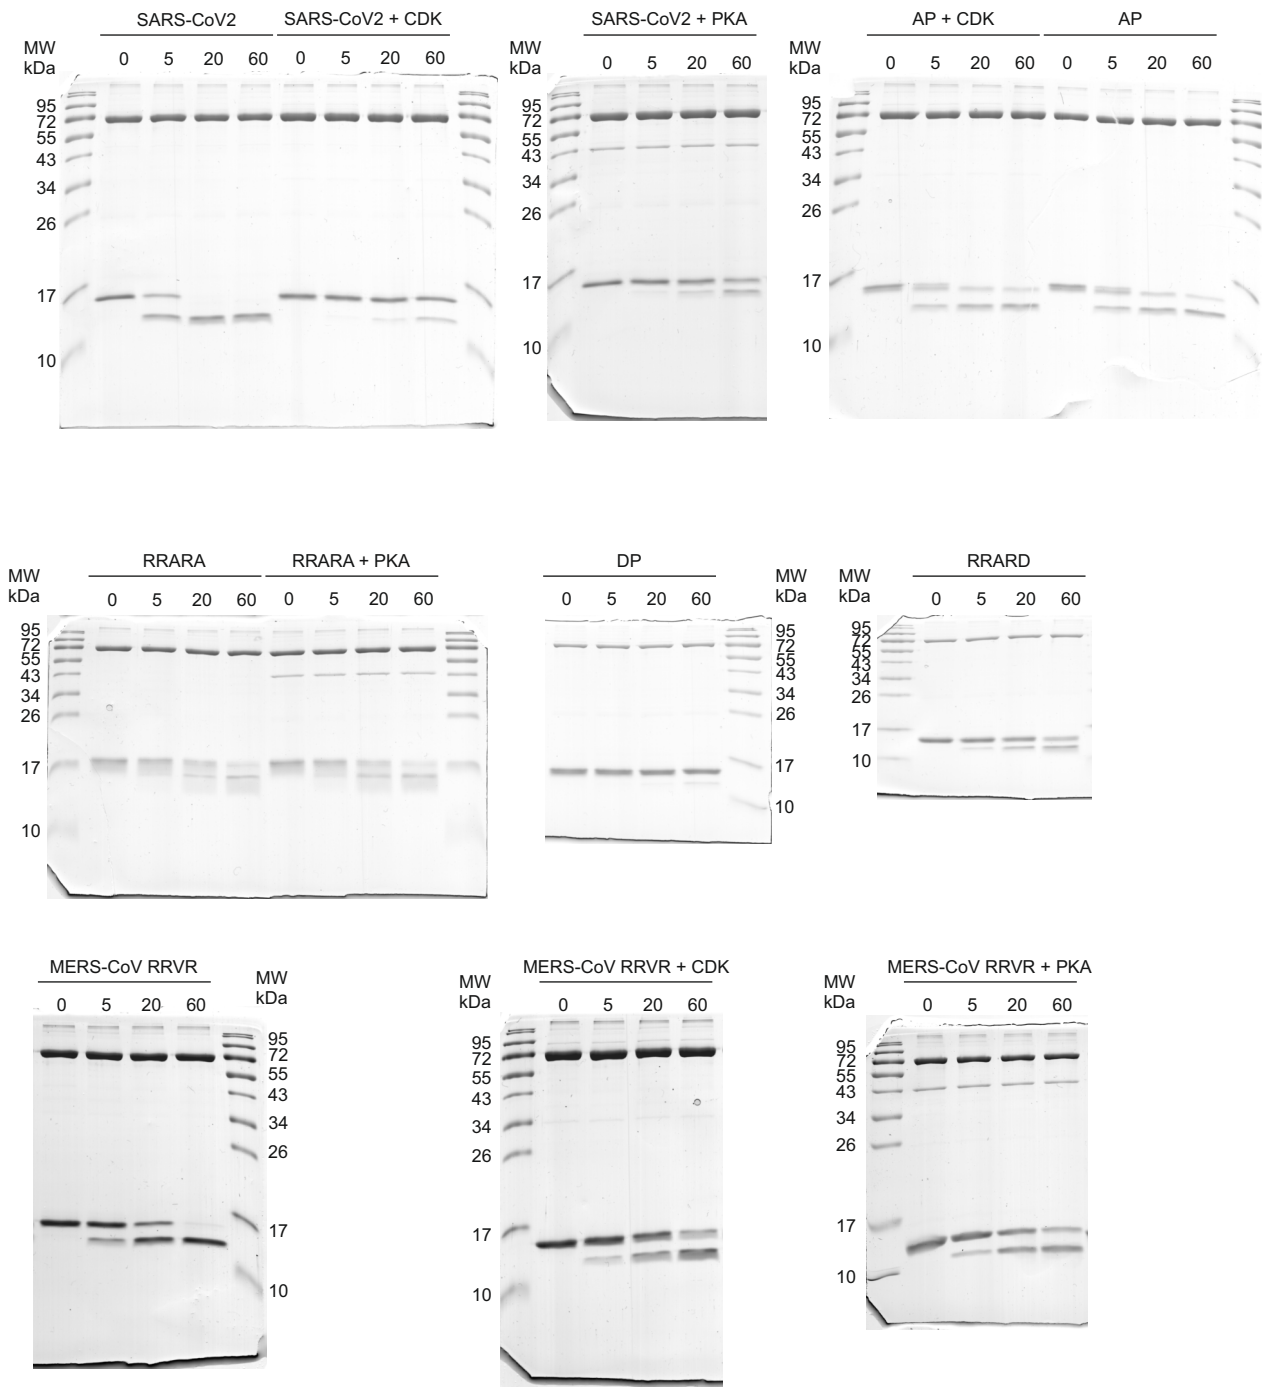

Supplementary Figure 4. Uncropped gels of Figure 4.
